# Supplementary material for: The Majority of Primate-Specific Regulatory Sequences Are Derived from Transposable Elements
Source: PubMed Central journal article supplement (PMC3649963; doi:10.1371/journal.pgen.1003504), 2013-05-09

**A**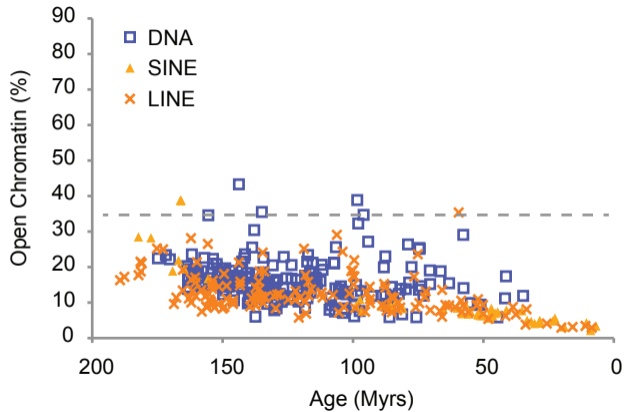**B**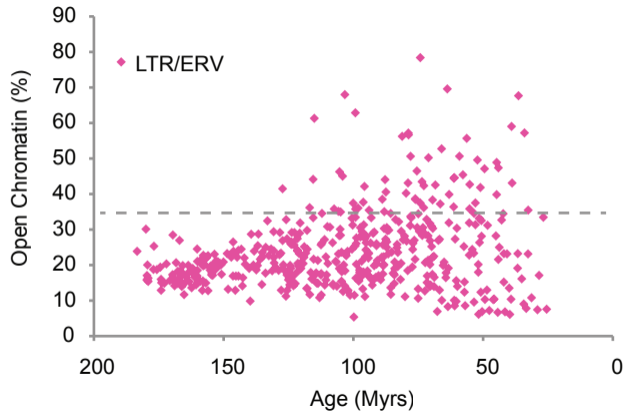

Supplement: pgen.1003504.s004.pdf [file pgen.1003504.s004.pdf]
