# Supplementary material for: The Majority of Primate-Specific Regulatory Sequences Are Derived from Transposable Elements
Source: PLoS Genet. 2013 May 9;9(5):e1003504. doi: 10.1371/journal.pgen.1003504 (PMC3649963; doi:10.1371/journal.pgen.1003504)
Supplement: Table S5 — Motifs enriched in cell type-specific DARs. (XLS) [file pgen.1003504.s020.xls]

## Sheet: TabS5--motifs_DHS
Table S5
UW vs Duke	DHS data set	Repeat subfamily	Motif name	TF name	Number of repeat instances with that motif	Number repeat instances contributing DHS	Total number repeat instances in genome	Proportion of repeat instances contributing to DHS with a motif
Uw	Rep1H7es	LTR7	UW.Motif.0143	UW.Motif.0143	792	1237	2337	0.640259
Uw	Rep1H7es	LTR7	UW.Motif.0265	UW.Motif.0265	560	1237	2337	0.452708
Uw	Rep1H7es	THE1D	UW.Motif.0191	UW.Motif.0191	548	1205	12639	0.454772
Uw	Rep1H7es	LTR7	UW.Motif.0562	UW.Motif.0562	536	1237	2337	0.433306
Uw	Rep1H7es	LTR7	UW.Motif.0318	UW.Motif.0318	523	1237	2337	0.422797
Uw	Rep1H7es	LTR7	UW.Motif.0181	UW.Motif.0181	515	1237	2337	0.41633
Uw	Rep1H7es	THE1D	UW.Motif.0322	UW.Motif.0322	491	1205	12639	0.407469
Uw	Rep1H7es	LTR7	UW.Motif.0432	UW.Motif.0432	484	1237	2337	0.391269
Uw	Rep1H7es	LTR7	UW.Motif.0538	UW.Motif.0538	424	1237	2337	0.342765
Uw	Rep1H7es	LTR7	UW.Motif.0663	UW.Motif.0663	424	1237	2337	0.342765
Uw	Rep1H7es	LTR7	UW.Motif.0541	UW.Motif.0541	370	1237	2337	0.299111
Uw	Rep1H7es	LTR7	UW.Motif.0232	UW.Motif.0232	361	1237	2337	0.291835
Uw	Rep1H7es	LTR7	UW.Motif.0637	UW.Motif.0637	358	1237	2337	0.28941
Uw	Rep1H7es	LTR7	UW.Motif.0340	UW.Motif.0340	343	1237	2337	0.277284
Uw	Rep1H7es	THE1D	UW.Motif.0229	UW.Motif.0229	336	1205	12639	0.278838
Uw	Rep1H7es	THE1D	UW.Motif.0481	UW.Motif.0481	330	1205	12639	0.273859
Uw	Rep1H7es	HERVH-int	M01714	KLF15	322	901	5887	0.357381
Uw	Rep1H7es	THE1D	UW.Motif.0323	UW.Motif.0323	317	1205	12639	0.263071
Uw	Rep1H7es	THE1D	UW.Motif.0606	UW.Motif.0606	314	1205	12639	0.260581
Uw	Rep1H7es	LTR7	UW.Motif.0067	UW.Motif.0067	312	1237	2337	0.252223
Uw	Rep1H7es	THE1D	UW.Motif.0560	UW.Motif.0560	310	1205	12639	0.257261
Uw	Rep1H7es	LTR7	UW.Motif.0595	UW.Motif.0595	302	1237	2337	0.244139
Uw	Rep1H7es	THE1D	UW.Motif.0538	UW.Motif.0538	293	1205	12639	0.243154
Uw	Rep1Hl60V2	MSTA	UP00085	SFPI1	292	858	19740	0.340326
Uw	Rep1H1es	LTR7	UW.Motif.0143	UW.Motif.0143	284	450	2337	0.631111
Uw	Rep1H7es	LTR7	UW.Motif.0206	UW.Motif.0206	272	1237	2337	0.219887
Uw	Rep1H7es	THE1D	M01478	CPHX	261	1205	12639	0.216598
Uw	Rep1H7es	LTR7	UP00093	KLF7	259	1237	2337	0.209378
Uw	Rep1Hee	Tigger3b	M00037	NFE2	258	880	6515	0.293182
Uw	Rep1H7es	LTR7	M01247	NANOG	258	1237	2337	0.208569
Uw	Rep1Hl60V2	MSTA	UW.Motif.0280	UW.Motif.0280	227	858	19740	0.264569
Uw	Rep1Cmk	MSTA	UW.Motif.0229	UW.Motif.0229	226	722	19740	0.313019
Uw	Rep1Hee	Tigger3b	UW.Motif.0189	UW.Motif.0189	218	880	6515	0.247727
Uw	Rep1H7es	MER1B	M01288	NEUROD1	217	416	5335	0.521635
Uw	Rep1Cmk	MSTA	UP00085	SFPI1	213	722	19740	0.295014
Uw	Rep1H7es	LTR9B	UP00179	POU2F3	212	246	761	0.861789
Uw	Rep1H7es	HERVH-int	M01175	ZBTB7B	211	901	5887	0.234184
Uw	Rep1H7es	HERVH-int	M01445	OBOX6	210	901	5887	0.233074
Uw	Rep1H7es	HERVH-int	M00649	MAZ	207	901	5887	0.229745
Uw	Rep1H7es	MER1B	UW.Motif.0232	UW.Motif.0232	206	416	5335	0.495192
Uw	Rep2Hee	Tigger3b	M00037	NFE2	203	737	6515	0.275441
Uw	Rep1H7es	LTR9B	MA0142	POU5F1	201	246	761	0.817073
Uw	Rep1Hl60V2	MSTA	UW.Motif.0229	UW.Motif.0229	199	858	19740	0.231935
Uw	Rep1Hl60V2	MSTA	UW.Motif.0435	UW.Motif.0435	199	858	19740	0.231935
Uw	Rep1H7es	HERVH-int	UP00021	ZFP281	194	901	5887	0.215316
Uw	Rep1Hee	Tigger3b	UW.Motif.0515	UW.Motif.0515	193	880	6515	0.219318
Uw	Rep1H7es	THE1C	UW.Motif.0322	UW.Motif.0322	192	577	9831	0.332756
Uw	Rep1H7es	MER1B	UW.Motif.0107	UW.Motif.0107	190	416	5335	0.456731
Uw	Rep1H1es	LTR7	UW.Motif.0562	UW.Motif.0562	190	450	2337	0.422222
Uw	Rep1H7es	THE1C	UW.Motif.0560	UW.Motif.0560	186	577	9831	0.322357
Uw	Rep1Cmk	MSTA	UW.Motif.0191	UW.Motif.0191	186	722	19740	0.257618
Uw	Rep1H7es	HERVH-int	M01118	WT1	185	901	5887	0.205327
Uw	Rep1H7es	THE1C	UW.Motif.0538	UW.Motif.0538	183	577	9831	0.317158
Uw	Rep2K562	MER41B	MA0137	STAT1	182	318	2847	0.572327
Uw	Rep1H7es	HERVH-int	UW.Motif.0012	UW.Motif.0012	182	901	5887	0.201998
Uw	Rep1Cmk	MSTA	M01478	CPHX	181	722	19740	0.250693
Uw	Rep1H1es	LTR7	UW.Motif.0265	UW.Motif.0265	178	450	2337	0.395556
Uw	Rep1H1es	LTR7	UW.Motif.0538	UW.Motif.0538	178	450	2337	0.395556
Uw	Rep1Cmk	MSTA	UW.Motif.0323	UW.Motif.0323	175	722	19740	0.242382
Uw	Rep1H7es	MER1B	UW.Motif.0341	UW.Motif.0341	173	416	5335	0.415865
Uw	Rep1H7es	THE1C	UW.Motif.0481	UW.Motif.0481	172	577	9831	0.298094
Uw	Rep1H7es	MSTA	M01478	CPHX	172	657	19740	0.261796
Uw	Rep1H1es	LTR7	UW.Motif.0181	UW.Motif.0181	171	450	2337	0.38
Uw	Rep2Hee	Tigger3b	UW.Motif.0189	UW.Motif.0189	170	737	6515	0.230665
Uw	Rep1Jurkat	MER51A	M00287	NFYA	168	199	954	0.844221
Uw	Rep1H1es	LTR7	UW.Motif.0318	UW.Motif.0318	168	450	2337	0.373333
Uw	Rep1H7es	MER4A1	UW.Motif.0613	UW.Motif.0613	165	348	2223	0.474138
Uw	Rep1Cmk	MSTA	UW.Motif.0566	UW.Motif.0566	165	722	19740	0.228532
Uw	Rep1H7es	LTR9	UP00179	POU2F3	164	312	1990	0.525641
Uw	Rep1H7es	LTR9	MA0142	POU5F1	163	312	1990	0.522436
Uw	Rep1H7es	MER1A	M01288	NEUROD1	161	310	3224	0.519355
Uw	Rep1H1es	LTR7	UW.Motif.0595	UW.Motif.0595	157	450	2337	0.348889
Uw	Rep1H7es	MER1A	UW.Motif.0232	UW.Motif.0232	156	310	3224	0.503226
Uw	Rep1Jurkat	MER51A	M00687	NFYA	154	199	954	0.773869
Uw	Rep1H7es	MER1A	UW.Motif.0107	UW.Motif.0107	154	310	3224	0.496774
Uw	Rep1H7es	MER4A1	UW.Motif.0440	UW.Motif.0440	153	348	2223	0.439655
Uw	Rep1Nb4V2	MSTA	UP00085	SFPI1	153	371	19740	0.412399
Uw	Rep1H7es	THE1C	UW.Motif.0229	UW.Motif.0229	153	577	9831	0.265165
Uw	Rep2Hee	Tigger3b	UW.Motif.0515	UW.Motif.0515	152	737	6515	0.206242
Uw	Rep1H7es	MSTA-int	MA0142	POU5F1	150	350	3165	0.428571
Uw	Rep1H7es	MSTA	UW.Motif.0229	UW.Motif.0229	149	657	19740	0.226788
Uw	Rep1Hee	LTR10F	M00495	BACH1	147	159	441	0.924528
Uw	Rep1H7es	THE1C	UW.Motif.0191	UW.Motif.0191	145	577	9831	0.2513
Uw	Rep1Cmk	MSTA	UW.Motif.0481	UW.Motif.0481	145	722	19740	0.200831
Uw	Rep1H1es	LTR7	MA0039	KLF4	139	450	2337	0.308889
Uw	Rep1H1es	LTR7	UP00093	KLF7	139	450	2337	0.308889
Uw	Rep1H7es	MSTA	M01714	KLF15	138	657	19740	0.210046
Uw	Rep2K562	MER41B	M00457	STAT5A	136	318	2847	0.427673
Uw	Rep1Cmk	THE1D	UW.Motif.0229	UW.Motif.0229	136	354	12639	0.384181
Uw	Rep1Cmk	THE1D	UW.Motif.0191	UW.Motif.0191	135	354	12639	0.381356
Uw	Rep1H1es	LTR9B	MA0142	POU5F1	134	167	761	0.802395
Duke	H9es	LTR9B	UP00179	POU2F3	134	178	761	0.752809
Uw	Rep1Hl60V2	THE1D	UW.Motif.0229	UW.Motif.0229	134	418	12639	0.320574
Uw	Rep1H1es	LTR7	UW.Motif.0432	UW.Motif.0432	134	450	2337	0.297778
Uw	Rep1H7es	MSTA	UW.Motif.0191	UW.Motif.0191	133	657	19740	0.202435
Uw	Rep1H1es	LTR9B	UP00179	POU2F3	132	167	761	0.790419
Uw	Rep1H7es	MER4B	MA0142	POU5F1	132	267	1725	0.494382
Uw	Rep1H7es	MSTA-int	UW.Motif.0432	UW.Motif.0432	131	350	3165	0.374286
Uw	Rep1H7es	MER74A	MA0142	POU5F1	128	282	1578	0.453901
Uw	Rep2Nb4	MSTA	UP00085	SFPI1	128	309	19740	0.414239
Uw	Rep1H7es	MER1A	UW.Motif.0341	UW.Motif.0341	128	310	3224	0.412903
Uw	Rep1H1es	LTR7	UW.Motif.0541	UW.Motif.0541	128	450	2337	0.284444
Duke	H9es	LTR9B	MA0142	POU5F1	122	178	761	0.685393
Uw	Rep2Hee	LTR10F	M00495	BACH1	121	133	441	0.909774
Uw	Rep1H1es	LTR7	M01734	NFATC4	120	450	2337	0.266667
Uw	Rep1H1es	LTR7	UW.Motif.0232	UW.Motif.0232	120	450	2337	0.266667
Uw	Rep1Cmk	THE1C	UW.Motif.0538	UW.Motif.0538	119	253	9831	0.470356
Uw	Rep1Hl60V2	THE1D	UW.Motif.0435	UW.Motif.0435	119	418	12639	0.284689
Uw	Rep1H7es	THE1C	UP00138	BSX	118	577	9831	0.204506
Uw	Rep1H1es	LTR7	UW.Motif.0663	UW.Motif.0663	115	450	2337	0.255556
Uw	Rep1H7es	MER4A1	UW.Motif.0573	UW.Motif.0573	114	348	2223	0.327586
Uw	Rep1Saec	LTR10F	M00495	BACH1	113	124	441	0.91129
Uw	Rep1H7es	MSTA-int	UW.Motif.0140	UW.Motif.0140	113	350	3165	0.322857
Uw	Rep1Cmk	THE1D	UW.Motif.0322	UW.Motif.0322	113	354	12639	0.319209
Uw	Rep2Mcf7	MER51A	M00287	NFYA	111	144	954	0.770833
Uw	Rep1Cmk	THE1D	M01478	CPHX	109	354	12639	0.30791
Uw	Rep1H7es	MER4A1	UW.Motif.0190	UW.Motif.0190	108	348	2223	0.310345
Uw	Rep1H7es	MER4A1	UW.Motif.0516	UW.Motif.0516	108	348	2223	0.310345
Duke	H9es	MER74A	MA0142	POU5F1	106	231	1578	0.458874
Uw	Rep1H7es	LTR9B	UW.Motif.0076	UW.Motif.0076	106	246	761	0.430894
Uw	Rep1Cmk	THE1C	UW.Motif.0560	UW.Motif.0560	105	253	9831	0.41502
Uw	Rep1H7es	MER4B	UW.Motif.0205	UW.Motif.0205	105	267	1725	0.393258
Uw	Rep1H1es	LTR7	UW.Motif.0206	UW.Motif.0206	104	450	2337	0.231111
Uw	Rep1H7es	MER4B	UW.Motif.0204	UW.Motif.0204	103	267	1725	0.385768
Uw	Rep1H7es	MER4A1	UW.Motif.0227	UW.Motif.0227	103	348	2223	0.295977
Uw	Rep1Hl60V2	THE1D	UW.Motif.0280	UW.Motif.0280	103	418	12639	0.246411
Uw	Rep1H1es	LTR7	UW.Motif.0340	UW.Motif.0340	103	450	2337	0.228889
Uw	Rep1H7es	MER4D1	UW.Motif.0355	UW.Motif.0355	102	350	1505	0.291429
Uw	Rep1Cmk	THE1D	UW.Motif.0481	UW.Motif.0481	101	354	12639	0.285311
Uw	Rep1Nb4V2	MSTA	UW.Motif.0229	UW.Motif.0229	101	371	19740	0.272237
Uw	Rep2K562	MER41B	M00459	STAT5B	99	318	2847	0.311321
Uw	Rep1Hl60V2	THE1D	UW.Motif.0481	UW.Motif.0481	99	418	12639	0.236842
Uw	Rep1H1es	LTR7	UW.Motif.0637	UW.Motif.0637	98	450	2337	0.217778
Uw	Rep2Mcf7	MER51A	M00687	NFYA	97	144	954	0.673611
Uw	Rep1H1es	LTR9	MA0142	POU5F1	97	178	1990	0.544944
Uw	Rep1H7es	LTR22C	M01590	SMAD1	96	269	386	0.356877
Uw	Rep1H7es	MER4A1	M00979	PAX6	96	348	2223	0.275862
Uw	Rep1H1es	LTR7	M00491	PATZ1	96	450	2337	0.213333
Uw	Rep1H1es	LTR7	UW.Motif.0067	UW.Motif.0067	96	450	2337	0.213333
Uw	Rep1H1es	MER1B	UW.Motif.0107	UW.Motif.0107	95	209	5335	0.454545
Uw	Rep1Hl60V2	THE1D	UW.Motif.0191	UW.Motif.0191	95	418	12639	0.227273
Uw	Rep1Hee	LTR10F	UW.Motif.0567	UW.Motif.0567	94	159	441	0.591195
Uw	Rep1Cmk	THE1C	UW.Motif.0229	UW.Motif.0229	94	253	9831	0.371542
Uw	Rep1H7es	MER4B	UW.Motif.0423	UW.Motif.0423	94	267	1725	0.35206
Uw	Rep1Nb4V2	MSTA	UP00419	SPIC	94	371	19740	0.253369
Uw	Rep1Mcf7	MER51A	M00287	NFYA	93	120	954	0.775
Uw	Rep2K562	MER41B	UW.Motif.0356	UW.Motif.0356	91	318	2847	0.286164
Uw	Rep1Nb4V2	MSTA	UW.Motif.0566	UW.Motif.0566	91	371	19740	0.245283
Uw	Rep1H7es	MER4B	UP00080	GATA5	90	267	1725	0.337079
Uw	Rep1H7es	MER74A	MA0143	SOX2	90	282	1578	0.319149
Duke	H9es	LTR9	MA0142	POU5F1	89	170	1990	0.523529
Uw	Rep2K562	MER41B	MA0144	STAT3	89	318	2847	0.279874
Uw	Rep1Hl60V2	THE1D	UP00085	SFPI1	89	418	12639	0.212919
Uw	Rep1H7es	MER4B	UW.Motif.0440	UW.Motif.0440	88	267	1725	0.329588
Uw	Rep1H7es	MER4B	UW.Motif.0513	UW.Motif.0513	88	267	1725	0.329588
Uw	Rep2Helas3	MER51A	M00287	NFYA	87	113	954	0.769912
Uw	Rep1H1es	MER1B	M01288	NEUROD1	87	209	5335	0.416268
Uw	Rep1H1es	MER1B	UW.Motif.0232	UW.Motif.0232	87	209	5335	0.416268
Uw	Rep1Cmk	THE1D	UW.Motif.0323	UW.Motif.0323	87	354	12639	0.245763
Uw	Rep1Mcf7	MER51A	M00687	NFYA	86	120	954	0.716667
Uw	Rep1H7es	LTR9	MA0039	KLF4	86	312	1990	0.275641
Uw	Rep1Jurkat	LTR12C	M00287	NFYA	86	339	2688	0.253687
Uw	Rep1Hl60V2	THE1D	UW.Motif.0560	UW.Motif.0560	86	418	12639	0.205742
Uw	Rep1H7es	MER4D	UW.Motif.0355	UW.Motif.0355	85	259	1319	0.328185
Uw	Rep1H7es	MER4B	UW.Motif.0339	UW.Motif.0339	84	267	1725	0.314607
Uw	Rep1Cmk	MER11A	M01728	NR2F6	83	244	954	0.340164
Uw	Rep1H7es	MSTA-int	UP00211	POU3F3	83	350	3165	0.237143
Uw	Rep1H1es	LTR9	UP00179	POU2F3	82	178	1990	0.460674
Uw	Rep1Hl60V2	THE1C	UW.Motif.0538	UW.Motif.0538	82	290	9831	0.282759
Duke	H9es	LTR9	UP00179	POU2F3	81	170	1990	0.476471
Uw	Rep1H7es	MER4E1	UW.Motif.0355	UW.Motif.0355	81	230	1056	0.352174
Uw	Rep1H7es	LTR9B	MA0143	SOX2	81	246	761	0.329268
Uw	Rep1Cmk	THE1C	UW.Motif.0322	UW.Motif.0322	81	253	9831	0.320158
Uw	Rep1H7es	LTR22C	UP00197	HOXC9	81	269	386	0.301115
Uw	Rep1H7es	MER4A1	UW.Motif.0421	UW.Motif.0421	81	348	2223	0.232759
Uw	Rep2Helas3	MER51A	M00687	NFYA	80	113	954	0.707965
Uw	Rep2Nb4	MSTA	UW.Motif.0229	UW.Motif.0229	80	309	19740	0.2589
Uw	Rep1H7es	MER4D1	UW.Motif.0205	UW.Motif.0205	80	350	1505	0.228571
Uw	Rep1Nb4V2	MSTA	UW.Motif.0191	UW.Motif.0191	80	371	19740	0.215633
Uw	Rep2Nb4	MSTA	UP00419	SPIC	79	309	19740	0.255663
Uw	Rep1H7es	LTR9	MA0143	SOX2	78	312	1990	0.25
Uw	Rep1H7es	MER11B	MA0107	RELA	77	121	552	0.636364
Uw	Rep2Hee	LTR10C	UP00030	SOX11	77	143	515	0.538462
Uw	Rep2K562	MER41B	UW.Motif.0308	UW.Motif.0308	77	318	2847	0.242138
Uw	Rep1H1es	MER1B	UW.Motif.0341	UW.Motif.0341	76	209	5335	0.363636
Uw	Rep1Nb4V2	MSTA	UW.Motif.0280	UW.Motif.0280	76	371	19740	0.204852
Duke	Myometr	MER44B	UW.Motif.0511	UW.Motif.0511	75	183	2125	0.409836
Duke	H9es	MER74A	MA0143	SOX2	75	231	1578	0.324675
Uw	Rep1Hl60V2	THE1C	UW.Motif.0435	UW.Motif.0435	75	290	9831	0.258621
Uw	Rep1H7es	MSTA-int	UW.Motif.0350	UW.Motif.0350	75	350	3165	0.214286
Uw	Rep2Hee	LTR10C	M01295	ATF5	74	143	515	0.517483
Uw	Rep1Hl60V2	THE1C	UW.Motif.0280	UW.Motif.0280	74	290	9831	0.255172
Uw	Rep1Cmk	THE1D	UW.Motif.0129	UW.Motif.0129	74	354	12639	0.20904
Uw	Rep1Saec	LTR10C	UP00030	SOX11	73	145	515	0.503448
Uw	Rep1H7es	MER4A1	UP00032	GATA3	73	348	2223	0.20977
Uw	Rep2Hee	LTR18A	M00037	NFE2	72	116	264	0.62069
Uw	Rep2Hee	LTR10F	UW.Motif.0567	UW.Motif.0567	72	133	441	0.541353
Uw	Rep2Hee	LTR10C	M01247	NANOG	72	143	515	0.503497
Uw	Rep1H1es	MER74A	MA0142	POU5F1	72	183	1578	0.393443
Uw	Rep1Jurkat	MER51A	UW.Motif.0524	UW.Motif.0524	72	199	954	0.361809
Uw	Rep1H7es	LTR22C	UP00110	DLX4	72	269	386	0.267658
Uw	Rep1H7es	LTR22C	UW.Motif.0122	UW.Motif.0122	72	269	386	0.267658
Uw	Rep1Jurkat	LTR12C	MA0039	KLF4	72	339	2688	0.212389
Uw	Rep1Saec	LTR10F	UW.Motif.0567	UW.Motif.0567	71	124	441	0.572581
Duke	K562V3	LTR12C	MA0039	KLF4	71	259	2688	0.274131
Duke	K562V3	LTR12C	UP00093	KLF7	71	259	2688	0.274131
Uw	Rep1Hee	LTR18A	M00037	NFE2	70	120	264	0.583333
Uw	Rep1Cmk	THE1C	UW.Motif.0481	UW.Motif.0481	70	253	9831	0.27668
Uw	Rep2Nb4	MSTA	UW.Motif.0191	UW.Motif.0191	70	309	19740	0.226537
Uw	Rep1Hee	LTR10C	UP00030	SOX11	69	137	515	0.50365
Uw	Rep1Saec	LTR10C	M01295	ATF5	69	145	515	0.475862
Uw	Rep1H1es	LTR9	MA0143	SOX2	69	178	1990	0.38764
Duke	AosmcSerumfree	MER44B	UW.Motif.0645	UW.Motif.0645	69	185	2125	0.372973
Uw	Rep1Hl60V2	THE1C	UW.Motif.0560	UW.Motif.0560	69	290	9831	0.237931
Uw	Rep1Jurkat	LTR12C	UP00093	KLF7	69	339	2688	0.20354
Uw	Rep2Hee	LTR10C	M01590	SMAD1	68	143	515	0.475524
Uw	Rep1Saec	LTR10C	M01590	SMAD1	68	145	515	0.468966
Duke	H9es	LTR9	MA0143	SOX2	68	170	1990	0.4
Uw	Rep1Cmk	MER11A	UP00028	TCFAP2E	68	244	954	0.278689
Uw	Rep1Cmk	MER11A	UW.Motif.0403	UW.Motif.0403	68	244	954	0.278689
Uw	Rep1Hl60V2	THE1C	UW.Motif.0229	UW.Motif.0229	68	290	9831	0.234483
Uw	Rep1H1es	LTR9B	MA0143	SOX2	67	167	761	0.401198
Uw	Rep1H7es	MER4A	UW.Motif.0227	UW.Motif.0227	67	216	1105	0.310185
Uw	Rep2Nb4	MSTA	UW.Motif.0280	UW.Motif.0280	67	309	19740	0.216828
Uw	Rep2Nb4	MSTA	UW.Motif.0566	UW.Motif.0566	67	309	19740	0.216828
Uw	Rep1Saec	MER61E	M01655	TRP53	66	79	323	0.835443
Uw	Rep2Hee	LTR10C	UP00419	SPIC	66	143	515	0.461538
Uw	Rep1Saec	LTR10C	M01247	NANOG	66	145	515	0.455172
Uw	Rep1H7es	LTR9	UW.Motif.0333	UW.Motif.0333	66	312	1990	0.211538
Uw	Rep1Hrcepic	LTR2B	UW.Motif.0562	UW.Motif.0562	65	100	332	0.65
Uw	Rep1Hee	LTR10C	M01590	SMAD1	65	137	515	0.474453
Uw	Rep2Hee	LTR10C	UW.Motif.0177	UW.Motif.0177	65	143	515	0.454545
Uw	Rep1Cmk	MER11A	UP00080	GATA5	65	244	954	0.266393
Uw	Rep2Helas3	LTR10F	M00495	BACH1	64	71	441	0.901408
Uw	Rep2Hee	MER61E	M01655	TRP53	64	74	323	0.864865
Uw	Rep1H7es	MER11B	UW.Motif.0012	UW.Motif.0012	64	121	552	0.528926
Uw	Rep1Hee	LTR10C	M01295	ATF5	64	137	515	0.467153
Uw	Rep2Hee	LTR10C	UP00401	SOX4	64	143	515	0.447552
Uw	Rep1H1es	MSTA-int	MA0142	POU5F1	64	147	3165	0.435374
Uw	Rep1H7es	LTR49	MA0142	POU5F1	64	209	1437	0.30622
Uw	Rep1Saec	MER61E	MA0106	TP53	63	79	323	0.797468
Uw	Rep2Hee	LTR10C	M01655	TRP53	63	143	515	0.440559
Uw	Rep1Saec	LTR10C	UP00401	SOX4	63	145	515	0.434483
Duke	AosmcSerumfree	Tigger7	UW.Motif.0645	UW.Motif.0645	63	152	3105	0.414474
Uw	Rep1H7es	LTR22C	UP00242	HOXC8	63	269	386	0.234201
Uw	Rep1H7es	LTR9	M00733	SMAD4	63	312	1990	0.201923
Uw	Rep1Hee	MER61E	M01655	TRP53	62	72	323	0.861111
Uw	Rep2Hrcepic	LTR2B	UW.Motif.0562	UW.Motif.0562	62	102	332	0.607843
Uw	Rep1H7es	MER11B	UW.Motif.0085	UW.Motif.0085	62	121	552	0.512397
Uw	Rep1Hee	LTR10C	M01247	NANOG	62	137	515	0.452555
Uw	Rep1H1es	LTR9B	UW.Motif.0076	UW.Motif.0076	62	167	761	0.371257
Uw	Rep1H7es	MER4D	UW.Motif.0203	UW.Motif.0203	62	259	1319	0.239382
Uw	Rep2Hee	LTR10C	UP00085	SFPI1	61	143	515	0.426573
Uw	Rep1Saec	LTR10C	UW.Motif.0177	UW.Motif.0177	61	145	515	0.42069
Uw	Rep1H7es	MER11C	MA0107	RELA	61	155	849	0.393548
Duke	NhekV2	MER44B	UW.Motif.0511	UW.Motif.0511	61	157	2125	0.388535
Uw	Rep1H7es	MER4A	UW.Motif.0384	UW.Motif.0384	61	216	1105	0.282407
Uw	Rep1Hl60V2	THE1C	UW.Motif.0677	UW.Motif.0677	61	290	9831	0.210345
Uw	Rep2Hee	MER61E	MA0106	TP53	60	74	323	0.810811
Uw	Rep2Hrcepic	LTR2B	M00205	NR3C1	60	102	332	0.588235
Uw	Rep2Mcf7	LTR9	UP00179	POU2F3	60	105	1990	0.571429
Uw	Rep1Hrcepic	LTR2B	M00205	NR3C1	59	100	332	0.59
Uw	Rep1Hee	LTR18A	UW.Motif.0316	UW.Motif.0316	59	120	264	0.491667
Uw	Rep1Cmk	THE1C	UW.Motif.0541	UW.Motif.0541	59	253	9831	0.233202
Uw	Rep1Hee	MER61E	MA0106	TP53	58	72	323	0.805556
Uw	Rep1Saec	MER61E	M01656	TRP63	58	79	323	0.734177
Uw	Rep1Saec	LTR18A	M00037	NFE2	58	96	264	0.604167
Uw	Rep1Hee	LTR18A	MA0025	NFIL3	58	120	264	0.483333
Uw	Rep2Hee	LTR10C	UP00409	ELF5	58	143	515	0.405594
Uw	Rep1H1es	MSTA-int	UW.Motif.0432	UW.Motif.0432	58	147	3165	0.394558
Uw	Rep1H7es	MER4B	UW.Motif.0295	UW.Motif.0295	58	267	1725	0.217228
Uw	Rep1H7es	LTR22C	MA0148	FOXA1	58	269	386	0.215613
Uw	Rep1Hee	MER61E	M01656	TRP63	57	72	323	0.791667
Uw	Rep2Hee	MER61E	M01656	TRP63	57	74	323	0.77027
Uw	Rep1H7es	LTR6B	UP00080	GATA5	57	103	152	0.553398
Uw	Rep2Hee	LTR18A	MA0025	NFIL3	57	116	264	0.491379
Uw	Rep1Hee	LTR10C	M01655	TRP53	57	137	515	0.416058
Uw	Rep1Hee	LTR10C	UP00401	SOX4	57	137	515	0.416058
Uw	Rep1Hee	LTR10C	UW.Motif.0177	UW.Motif.0177	57	137	515	0.416058
Duke	H9es	LTR49	MA0142	POU5F1	57	143	1437	0.398601
Duke	AosmcSerumfree	MER44B	UW.Motif.0511	UW.Motif.0511	57	185	2125	0.308108
Uw	Rep1H7es	LTR1	MA0039	KLF4	57	242	1420	0.235537
Duke	K562V3	LTR12C	M01288	NEUROD1	57	259	2688	0.220077
Duke	K562V3	LTR12C	UP00002	SP4	57	259	2688	0.220077
Uw	Rep1Gm12865	MER57B2	UW.Motif.0213	UW.Motif.0213	56	87	1095	0.643678
Uw	Rep1H7es	MER4A	UW.Motif.0372	UW.Motif.0372	56	216	1105	0.259259
Uw	Rep1H7es	LTR1	UP00093	KLF7	56	242	1420	0.231405
Uw	Rep2Hee	LTR10C	MA0106	TP53	55	143	515	0.384615
Uw	Rep1H1es	LTR1	MA0039	KLF4	55	188	1420	0.292553
Duke	K562V3	LTR12C	MA0079	SP1	55	259	2688	0.212355
Uw	Rep1Saec	MER61C	M01655	TRP53	54	60	305	0.9
Uw	Rep1H7es	LTR6B	UW.Motif.0593	UW.Motif.0593	54	103	152	0.524272
Uw	Rep1Hee	LTR18A	M00821	NFE2L2	54	120	264	0.45
Uw	Rep1Saec	LTR10C	UP00419	SPIC	54	145	515	0.372414
Uw	Rep1H7es	MER67C	MA0142	POU5F1	54	185	1646	0.291892
Uw	Rep1H7es	LTR9B	M01744	ZFP42	54	246	761	0.219512
Uw	Rep1Hrcepic	LTR2B	M00665	SP3	53	100	332	0.53
Uw	Rep1H7es	LTR6B	UW.Motif.0132	UW.Motif.0132	53	103	152	0.514563
Uw	Rep2Hee	LTR18A	UW.Motif.0316	UW.Motif.0316	53	116	264	0.456897
Uw	Rep1Hee	LTR10C	MA0106	TP53	53	137	515	0.386861
Duke	AosmcSerumfree	Tigger7	UW.Motif.0511	UW.Motif.0511	53	152	3105	0.348684
Uw	Rep1H1es	MER74A	MA0143	SOX2	53	183	1578	0.289617
Uw	Rep1Jurkat	MER51A	UW.Motif.0514	UW.Motif.0514	53	199	954	0.266332
Uw	Rep1H7es	LTR9B	UW.Motif.0200	UW.Motif.0200	53	246	761	0.215447
Uw	Rep1H7es	MER4D	UW.Motif.0339	UW.Motif.0339	53	259	1319	0.204633
Uw	Rep1Hee	MER61C	M01655	TRP53	52	60	305	0.866667
Uw	Rep1Cmk	MER61E	MA0035	GATA1	52	81	323	0.641975
Uw	Rep1Mcf7	LTR9	UP00179	POU2F3	52	91	1990	0.571429
Uw	Rep2Hrcepic	LTR2B	M00665	SP3	52	102	332	0.509804
Uw	Rep1H7es	LTR6B	UP00138	BSX	52	103	152	0.504854
Uw	Rep1Hee	LTR18A	M00983	MAF	52	120	264	0.433333
Uw	Rep1Hee	LTR10C	UP00419	SPIC	52	137	515	0.379562
Uw	Rep1Saec	LTR10C	M01655	TRP53	52	145	515	0.358621
Uw	Rep1H7es	MER67D	UW.Motif.0103	UW.Motif.0103	52	210	1022	0.247619
Uw	Rep2Hee	MER61C	M01655	TRP53	51	60	305	0.85
Uw	Rep1H7es	LTR19B	UW.Motif.0648	UW.Motif.0648	51	84	276	0.607143
Uw	Rep2K562	LTR15	M01248	NR0B1	51	96	271	0.53125
Uw	Rep2Hee	LTR18A	M00983	MAF	51	116	264	0.439655
Uw	Rep2K562	LTR9	UP00179	POU2F3	51	120	1990	0.425
Uw	Rep1H7es	MSTB-int	UW.Motif.0432	UW.Motif.0432	51	159	867	0.320755
Duke	H9es	LTR9B	UW.Motif.0076	UW.Motif.0076	51	178	761	0.286517
Duke	Myometr	MER44B	UW.Motif.0645	UW.Motif.0645	51	183	2125	0.278689
Uw	Rep1H1es	LTR1	UW.Motif.0519	UW.Motif.0519	51	188	1420	0.271277
Uw	Rep1Jurkat	MER51A	UP00179	POU2F3	51	199	954	0.256281
Uw	Rep1H7es	MER67D	MA0142	POU5F1	51	210	1022	0.242857
Uw	Rep1H7es	LTR1	UW.Motif.0519	UW.Motif.0519	51	242	1420	0.210744
Uw	Rep1Hre	LTR10F	M00495	BACH1	50	53	441	0.943396
Uw	Rep2Hrcepic	LTR10F	M00495	BACH1	50	53	441	0.943396
Uw	Rep2Gm12865	MER57B2	UW.Motif.0213	UW.Motif.0213	50	77	1095	0.649351
Uw	Rep1Saec	MER61E	MA0035	GATA1	50	79	323	0.632911
Uw	Rep2Hee	LTR18A	M00821	NFE2L2	50	116	264	0.431034
Uw	Rep1Cmk	LTR2	UW.Motif.0562	UW.Motif.0562	50	119	881	0.420168
Uw	Rep1H1es	LTR9	UW.Motif.0333	UW.Motif.0333	50	178	1990	0.280899
Uw	Rep1Hrcepic	LTR10F	M00495	BACH1	49	52	441	0.942308
Uw	Rep1Saec	MER61E	M01591	TAL1	49	79	323	0.620253
Duke	K562V3	LTR9	UP00179	POU2F3	49	99	1990	0.494949
Uw	Rep1H7es	LTR6B	UW.Motif.0295	UW.Motif.0295	49	103	152	0.475728
Uw	Rep1Hee	LTR10C	UP00085	SFPI1	49	137	515	0.357664
Uw	Rep1Saec	LTR10C	UP00085	SFPI1	49	145	515	0.337931
Uw	Rep1H7es	MER4E1	UW.Motif.0665	UW.Motif.0665	49	230	1056	0.213043
Uw	Rep2Hee	Tigger3c	M00037	NFE2	49	243	2369	0.201646
Uw	Rep1Hre	LTR2B	UW.Motif.0562	UW.Motif.0562	48	78	332	0.615385
Uw	Rep1Cmk	MER61E	M01591	TAL1	48	81	323	0.592593
Uw	Rep2K562	LTR15	M00348	GATA2	48	96	271	0.5
Uw	Rep2Hee	LTR18A	M00260	HLF	48	116	264	0.413793
Uw	Rep1Hee	LTR18A	M00260	HLF	48	120	264	0.4
Uw	Rep1H7es	LTR22B	MA0148	FOXA1	48	129	226	0.372093
Uw	Rep1H7es	MER66B	UP00056	RFX4	48	151	1407	0.317881
Duke	NhekV2	MER44B	UW.Motif.0645	UW.Motif.0645	48	157	2125	0.305732
Duke	H9es	LTR9	UW.Motif.0333	UW.Motif.0333	48	170	1990	0.282353
Uw	Rep1H7es	MER4A	UW.Motif.0190	UW.Motif.0190	48	216	1105	0.222222
Duke	NhekV2	LTR10F	M00495	BACH1	47	50	441	0.94
Uw	Rep1Saec	LTR18A	M00821	NFE2L2	47	96	264	0.489583
Uw	Rep2Hrcepic	LTR2B	UW.Motif.0380	UW.Motif.0380	47	102	332	0.460784
Uw	Rep1H7es	MER61A	M00491	PATZ1	47	135	797	0.348148
Uw	Rep1Saec	LTR10C	UP00409	ELF5	47	145	515	0.324138
Uw	Rep1H1es	MSTA-int	UW.Motif.0140	UW.Motif.0140	47	147	3165	0.319728
Uw	Rep1H7es	HERVIP10FH-int	UW.Motif.0339	UW.Motif.0339	47	149	679	0.315436
Uw	Rep1H7es	HERVIP10FH-int	UW.Motif.0595	UW.Motif.0595	47	149	679	0.315436
Duke	H9es	LTR9B	UW.Motif.0333	UW.Motif.0333	47	178	761	0.264045
Uw	Rep1H7es	MER4A	UW.Motif.0440	UW.Motif.0440	47	216	1105	0.217593
Uw	Rep1Saec	MER61C	MA0106	TP53	46	60	305	0.766667
Uw	Rep2Hee	MER61E	MA0035	GATA1	46	74	323	0.621622
Uw	Rep2Gm12865	MER44A	M00258	STAT1	46	97	2351	0.474227
Uw	Rep2Mcf7	LTR9	MA0039	KLF4	46	105	1990	0.438095
Uw	Rep2Mcf7	LTR9	MA0142	POU5F1	46	105	1990	0.438095
Uw	Rep1H7es	MSTB-int	MA0142	POU5F1	46	159	867	0.289308
Uw	Rep1H7es	MSTB-int	MA0143	SOX2	46	159	867	0.289308
Duke	AosmcSerumfree	MER44B	UW.Motif.0409	UW.Motif.0409	46	185	2125	0.248649
Uw	Rep1H7es	MER67D	UW.Motif.0270	UW.Motif.0270	46	210	1022	0.219048
Uw	Rep1H7es	MER4A	UW.Motif.0184	UW.Motif.0184	46	216	1105	0.212963
Uw	Rep2Hre	LTR10F	M00495	BACH1	45	47	441	0.957447
Uw	Rep1Hee	MER61C	MA0106	TP53	45	60	305	0.75
Uw	Rep2Hee	MER61C	MA0106	TP53	45	60	305	0.75
Uw	Rep1Hre	LTR2B	M00205	NR3C1	45	78	332	0.576923
Uw	Rep1Hre	LTR2B	M00665	SP3	45	78	332	0.576923
Uw	Rep1Saec	LTR18A	M00983	MAF	45	96	264	0.46875
Uw	Rep1Saec	LTR18A	MA0025	NFIL3	45	96	264	0.46875
Uw	Rep2K562	LTR15	MA0035	GATA1	45	96	271	0.46875
Uw	Rep2K562	LTR15	UP00079	ESRRA	45	96	271	0.46875
Uw	Rep1Saec	LTR18A	UW.Motif.0316	UW.Motif.0316	45	96	264	0.46875
Uw	Rep1H7es	LTR6B	UW.Motif.0109	UW.Motif.0109	45	103	152	0.436893
Uw	Rep1Hee	LTR10C	UP00409	ELF5	45	137	515	0.328467
Uw	Rep1H1es	MER4D1	UW.Motif.0631	UW.Motif.0631	45	140	1505	0.321429
Uw	Rep1H1es	LTR1	UP00093	KLF7	45	188	1420	0.239362
Uw	Rep1Jurkat	MER51A	UW.Motif.0624	UW.Motif.0624	45	199	954	0.226131
Uw	Rep2Hre	LTR2B	UW.Motif.0562	UW.Motif.0562	44	71	332	0.619718
Uw	Rep2Hee	MER61E	M01591	TAL1	44	74	323	0.594595
Uw	Rep1Saec	MER61E	M01748	NFATC1	44	79	323	0.556962
Uw	Rep1Hrcepic	LTR2B	UW.Motif.0380	UW.Motif.0380	44	100	332	0.44
Uw	Rep2Hrcepic	LTR2B	MA0007	AR	44	102	332	0.431373
Uw	Rep1H1es	LTR49	MA0142	POU5F1	44	106	1437	0.415094
Uw	Rep1Cmk	THE1A	UW.Motif.0229	UW.Motif.0229	44	115	4219	0.382609
Uw	Rep1Hee	LTR18A	M00806	NF1	44	120	264	0.366667
Uw	Rep1H7es	MER11B	UW.Motif.0392	UW.Motif.0392	44	121	552	0.363636
Uw	Rep2Mcf7	MER51A	UW.Motif.0524	UW.Motif.0524	44	144	954	0.305556
Uw	Rep1Hee	LTR10F	UP00409	ELF5	44	159	441	0.27673
Duke	H9es	LTR9B	UW.Motif.0435	UW.Motif.0435	44	178	761	0.247191
Uw	Rep2Hee	LTR10E	M01656	TRP63	43	54	282	0.796296
Duke	H9es	MER4B	MA0142	POU5F1	43	89	1725	0.483146
Uw	Rep1H7es	MER74B	MA0143	SOX2	43	119	936	0.361345
Uw	Rep1Hee	LTR18A	M00495	BACH1	43	120	264	0.358333
Duke	H9es	MER4D	UW.Motif.0355	UW.Motif.0355	43	139	1319	0.309353
Uw	Rep1Saec	LTR10C	MA0106	TP53	43	145	515	0.296552
Uw	Rep1H7es	MER11C	MA0101	REL	43	155	849	0.277419
Uw	Rep1H7es	MER11C	UW.Motif.0513	UW.Motif.0513	43	155	849	0.277419
Uw	Rep1Nb4V2	MER57A1	UP00419	SPIC	42	57	1044	0.736842
Uw	Rep1Hee	MER61E	M01748	NFATC1	42	72	323	0.583333
Uw	Rep1Hee	MER61E	MA0035	GATA1	42	72	323	0.583333
Uw	Rep2Hee	MER61E	M01748	NFATC1	42	74	323	0.567568
Uw	Rep2K562	LTR15	UW.Motif.0338	UW.Motif.0338	42	96	271	0.4375
Duke	K562V3	LTR9	MA0142	POU5F1	42	99	1990	0.424242
Uw	Rep1Hrcepic	LTR2B	MA0007	AR	42	100	332	0.42
Uw	Rep2Gm12865	LTR2B	UW.Motif.0286	UW.Motif.0286	42	104	332	0.403846
Uw	Rep1Gm12865	LTR2B	UW.Motif.0562	UW.Motif.0562	42	104	332	0.403846
Uw	Rep1Cmk	THE1A	UW.Motif.0560	UW.Motif.0560	42	115	4219	0.365217
Uw	Rep2Hee	LTR18A	M00806	NF1	42	116	264	0.362069
Uw	Rep1H7es	LTR22B	UW.Motif.0264	UW.Motif.0264	42	129	226	0.325581
Uw	Rep2Hrpe	MLT2A2	M01450	OBOX1	42	163	3882	0.257669
Uw	Rep1Hrpe	MLT2A2	M01450	OBOX1	42	171	3882	0.245614
Uw	Rep2Hre	LTR2B	M00665	SP3	41	71	332	0.577465
Duke	H9es	MER74B	MA0143	SOX2	41	81	936	0.506173
Duke	H9es	MER4A1	UW.Motif.0440	UW.Motif.0440	41	84	2223	0.488095
Uw	Rep1H7es	LTR6A	UP00080	GATA5	41	89	271	0.460674
Uw	Rep2K562	LTR15	UW.Motif.0135	UW.Motif.0135	41	96	271	0.427083
Uw	Rep1H1es	MER4A1	UW.Motif.0440	UW.Motif.0440	41	100	2223	0.41
Uw	Rep2Gm12865	LTR2B	MA0146	ZFX	41	104	332	0.394231
Uw	Rep2Hee	LTR18A	M00495	BACH1	41	116	264	0.353448
Uw	Rep1H7es	MER74B	MA0142	POU5F1	41	119	936	0.344538
Uw	Rep2K562	LTR9	MA0039	KLF4	41	120	1990	0.341667
Duke	H9es	LTR9B	MA0143	SOX2	41	178	761	0.230337
Uw	Rep1H7es	MER67C	UW.Motif.0103	UW.Motif.0103	41	185	1646	0.221622
Uw	Rep2Mcf7	LTR10F	M00495	BACH1	40	46	441	0.869565
Uw	Rep1Hee	LTR10E	M01656	TRP63	40	50	282	0.8
Uw	Rep1Saec	MER61D	M01655	TRP53	40	57	273	0.701754
Duke	Gm19238V2	LTR2B	MA0146	ZFX	40	62	332	0.645161
Uw	Rep2Helas3	LTR10F	UW.Motif.0567	UW.Motif.0567	40	71	441	0.56338
Uw	Rep1Hee	MER61E	M01591	TAL1	40	72	323	0.555556
Duke	Medullo	MSTC	UP00055	HBP1	40	174	3152	0.229885
Uw	Rep1H7es	MER67C	M00480	TOPORS	40	185	1646	0.216216
Duke	AosmcSerumfree	MER44B	MA0040	FOXQ1	40	185	2125	0.216216
Uw	Rep2Hee	LTR10E	MA0106	TP53	39	54	282	0.722222
Uw	Rep1Saec	MER61C	M01656	TRP63	39	60	305	0.65
Uw	Rep2Hre	LTR2B	M00205	NR3C1	39	71	332	0.549296
Duke	H9es	MER67C	MA0142	POU5F1	39	79	1646	0.493671
Uw	Rep1Saec	LTR18A	M00495	BACH1	39	96	264	0.40625
Duke	K562V3	LTR9	MA0039	KLF4	39	99	1990	0.393939
Uw	Rep1H1es	MER67C	MA0142	POU5F1	39	101	1646	0.386139
Uw	Rep1H7es	LTR5B	UW.Motif.0581	UW.Motif.0581	39	101	423	0.386139
Uw	Rep1Gm12865	LTR2B	M00205	NR3C1	39	104	332	0.375
Duke	K562V3	LTR1	UP00093	KLF7	39	137	1420	0.284672
Duke	H9es	LTR1	MA0039	KLF4	39	148	1420	0.263514
Uw	Rep1Hee	LTR10F	M00287	NFYA	39	159	441	0.245283
Duke	AosmcSerumfree	MER44B	M01244	HSF2	39	185	2125	0.210811
Uw	Rep2Hee	LTR10E	M01655	TRP53	38	54	282	0.703704
Uw	Rep1Hee	MER61D	M01655	TRP53	38	55	273	0.690909
Uw	Rep1Nb4V2	MER57A1	UW.Motif.0213	UW.Motif.0213	38	57	1044	0.666667
Uw	Rep2K562	MER61E	MA0035	GATA1	38	69	323	0.550725
Uw	Rep1Saec	MER61E	M00082	RUNX1	38	79	323	0.481013
Duke	H9es	MER67D	MA0142	POU5F1	38	79	1022	0.481013
Duke	H9es	MER74B	MA0142	POU5F1	38	81	936	0.469136
Duke	H9es	MER4B	UW.Motif.0205	UW.Motif.0205	38	89	1725	0.426966
Uw	Rep1H1es	MER67D	MA0142	POU5F1	38	94	1022	0.404255
Uw	Rep1Gm12865	LTR2B	MA0146	ZFX	38	104	332	0.365385
Uw	Rep1Gm12865	LTR2B	UW.Motif.0286	UW.Motif.0286	38	104	332	0.365385
Uw	Rep1Mcf7	MER51A	UW.Motif.0524	UW.Motif.0524	38	120	954	0.316667
Uw	Rep1H7es	MER11C	UP00190	NKX2-3	38	155	849	0.245161
Uw	Rep1H7es	MSTB-int	M01247	NANOG	38	159	867	0.238994
Uw	Rep1H1es	LTR9	M00733	SMAD4	38	178	1990	0.213483
Uw	Rep1H7es	MER67C	UW.Motif.0270	UW.Motif.0270	38	185	1646	0.205405
Uw	Rep1H1es	MER52A	M01288	NEUROD1	38	189	1816	0.201058
Uw	Rep1Hee	LTR10E	MA0106	TP53	37	50	282	0.74
Uw	Rep2Hee	LTR10E	UP00077	SRF	37	54	282	0.685185
Uw	Rep1Saec	MER61D	M01656	TRP63	37	57	273	0.649123
Uw	Rep2Helas3	LTR10A	UW.Motif.0189	UW.Motif.0189	37	70	315	0.528571
Uw	Rep1Hae	LTR13A	UW.Motif.0583	UW.Motif.0583	37	70	187	0.528571
Uw	Rep2Hee	MER61E	M00082	RUNX1	37	74	323	0.5
Duke	Mcf7	LTR9	UP00179	POU2F3	37	77	1990	0.480519
Uw	Rep1Gm12865	MER44A	M00258	STAT1	37	89	2351	0.41573
Uw	Rep1Mcf7	LTR9	MA0039	KLF4	37	91	1990	0.406593
Uw	Rep2Gm12865	MER44A	M00699	IRF8	37	97	2351	0.381443
Uw	Rep1Jurkat	LTR1	MA0039	KLF4	37	97	1420	0.381443
Uw	Rep1H1es	MER4A1	UW.Motif.0613	UW.Motif.0613	37	100	2223	0.37
Uw	Rep2Gm12865	LTR2B	UW.Motif.0562	UW.Motif.0562	37	104	332	0.355769
Uw	Rep2K562	LTR9	MA0142	POU5F1	37	120	1990	0.308333
Uw	Rep1H7es	LTR22B	M00472	FOXO4	37	129	226	0.286822
Uw	Rep1H7es	LTR22B	UW.Motif.0343	UW.Motif.0343	37	129	226	0.286822
Uw	Rep1H1es	MER4D1	UW.Motif.0191	UW.Motif.0191	37	140	1505	0.264286
Uw	Rep1H1es	LTR9B	UW.Motif.0333	UW.Motif.0333	37	167	761	0.221557
Duke	Medullo	MSTC	UW.Motif.0184	UW.Motif.0184	37	174	3152	0.212644
Uw	Rep1Saec	LTR10E	M01656	TRP63	36	43	282	0.837209
Uw	Rep1Hee	LTR10E	M01655	TRP53	36	50	282	0.72
Uw	Rep2Hee	MER61D	M01655	TRP53	36	53	273	0.679245
Uw	Rep1Hee	MER61C	M01656	TRP63	36	60	305	0.6
Uw	Rep2Hee	MER61C	M01656	TRP63	36	60	305	0.6
Uw	Rep2Hre	LTR13A	UW.Motif.0490	UW.Motif.0490	36	66	187	0.545455
Uw	Rep1Hre	LTR13A	UW.Motif.0490	UW.Motif.0490	36	73	187	0.493151
Uw	Rep1Hre	LTR13A	UW.Motif.0583	UW.Motif.0583	36	73	187	0.493151
Uw	Rep1Hre	LTR2B	UW.Motif.0380	UW.Motif.0380	36	78	332	0.461538
Uw	Rep2Mcf7	MER11D	UW.Motif.0142	UW.Motif.0142	36	87	260	0.413793
Uw	Rep2Mcf7	MER11D	UW.Motif.0682	UW.Motif.0682	36	87	260	0.413793
Uw	Rep1Saec	LTR18A	M00260	HLF	36	96	264	0.375
Uw	Rep2K562	LTR5B	UW.Motif.0510	UW.Motif.0510	36	103	423	0.349515
Uw	Rep1Saec	LTR10F	UP00409	ELF5	36	124	441	0.290323
Duke	K562V3	LTR1	MA0039	KLF4	36	137	1420	0.262774
Duke	H9es	MER4D1	UW.Motif.0191	UW.Motif.0191	36	137	1505	0.262774
Duke	H9es	MER4D1	UW.Motif.0631	UW.Motif.0631	36	137	1505	0.262774
Uw	Rep1H1es	MSTA-int	MA0146	ZFX	36	147	3165	0.244898
Uw	Rep1Hee	LTR10F	UP00090	ELF3	36	159	441	0.226415
Duke	H9es	LTR9	M00733	SMAD4	36	170	1990	0.211765
Uw	Rep2Nb4	MER57A1	UP00419	SPIC	35	49	1044	0.714286
Uw	Rep1Hee	LTR10A	UW.Motif.0189	UW.Motif.0189	35	53	315	0.660377
Uw	Rep2Hre	LTR13A	UW.Motif.0583	UW.Motif.0583	35	66	187	0.530303
Uw	Rep1Hre	LTR2B	MA0007	AR	35	78	332	0.448718
Uw	Rep1Saec	MER61E	M00348	GATA2	35	79	323	0.443038
Duke	H9es	MER4A1	UW.Motif.0190	UW.Motif.0190	35	84	2223	0.416667
Duke	Myometr	MER44C	UW.Motif.0511	UW.Motif.0511	35	86	850	0.406977
Duke	AosmcSerumfree	MER44C	UW.Motif.0511	UW.Motif.0511	35	92	850	0.380435
Uw	Rep1H1es	MER4D	UW.Motif.0355	UW.Motif.0355	35	128	1319	0.273438
Uw	Rep2Hee	LTR10F	UP00409	ELF5	35	133	441	0.263158
Uw	Rep1H7es	MER61A	UW.Motif.0531	UW.Motif.0531	35	135	797	0.259259
Duke	H9es	LTR1	UP00093	KLF7	35	148	1420	0.236486
Duke	AosmcSerumfree	Tigger7	MA0040	FOXQ1	35	152	3105	0.230263
Duke	AosmcSerumfree	Tigger7	MA0041	FOXD3	35	152	3105	0.230263
Duke	AosmcSerumfree	Tigger7	UW.Motif.0409	UW.Motif.0409	35	152	3105	0.230263
Uw	Rep1H7es	MER11C	MA0143	SOX2	35	155	849	0.225806
Uw	Rep1H7es	MER11C	UP00119	NKX2-9	35	155	849	0.225806
Uw	Rep1Hee	LTR10F	MA0073	RREB1	35	159	441	0.220126
Uw	Rep1H7es	MSTB-int	UW.Motif.0206	UW.Motif.0206	35	159	867	0.220126
Uw	Rep1H1es	LTR9B	M01744	ZFP42	35	167	761	0.209581
Uw	Rep2Panc1	LTR10F	M00495	BACH1	34	40	441	0.85
Uw	Rep2Mcf7	MER11B	MA0107	RELA	34	43	552	0.790698
Uw	Rep1Hee	MER61D	M01656	TRP63	34	55	273	0.618182
Uw	Rep2Hee	MER61E	M00348	GATA2	34	74	323	0.459459
Uw	Rep1Mcf7	LTR9	MA0142	POU5F1	34	91	1990	0.373626
Uw	Rep1Saec	LTR18A	M00806	NF1	34	96	264	0.354167
Uw	Rep2Mcf7	LTR9	M00733	SMAD4	34	105	1990	0.32381
Uw	Rep2Mcf7	LTR9	UW.Motif.0333	UW.Motif.0333	34	105	1990	0.32381
Uw	Rep1Mcf7	MER51A	UP00179	POU2F3	34	120	954	0.283333
Duke	H9es	MER4D1	UW.Motif.0355	UW.Motif.0355	34	137	1505	0.248175
Uw	Rep1Hee	LTR10F	M00444	VDR	34	159	441	0.213836
Duke	H9es	MSTB1	UW.Motif.0569	UW.Motif.0569	34	163	5032	0.208589
Uw	Rep1Saec	LTR10E	MA0106	TP53	33	43	282	0.767442
Uw	Rep2Mcf7	MER11B	UW.Motif.0085	UW.Motif.0085	33	43	552	0.767442
Uw	Rep1Saec	LTR10A	UW.Motif.0189	UW.Motif.0189	33	52	315	0.634615
Duke	Gm12878V3	MER57B2	UW.Motif.0213	UW.Motif.0213	33	52	1095	0.634615
Uw	Rep1Hl60V2	LOR1a	UW.Motif.0353	UW.Motif.0353	33	61	811	0.540984
Uw	Rep1Cmk	LTR19B	UW.Motif.0648	UW.Motif.0648	33	62	276	0.532258
Duke	H9es	MER61A	M00491	PATZ1	33	64	797	0.515625
Uw	Rep2Hae	LTR13A	UW.Motif.0583	UW.Motif.0583	33	65	187	0.507692
Uw	Rep1Hae	LTR13A	UW.Motif.0490	UW.Motif.0490	33	70	187	0.471429
Uw	Rep1Hee	MER61E	M00082	RUNX1	33	72	323	0.458333
Uw	Rep1H7es	LTR19B	M00806	NF1	33	84	276	0.392857
Uw	Rep2K562	LTR2	UW.Motif.0562	UW.Motif.0562	33	88	881	0.375
Duke	H9es	MER4B	UW.Motif.0204	UW.Motif.0204	33	89	1725	0.370787
Duke	H9es	MER4B	UW.Motif.0513	UW.Motif.0513	33	89	1725	0.370787
Uw	Rep1H7es	LTR7C	UW.Motif.0663	UW.Motif.0663	33	90	320	0.366667
Duke	AosmcSerumfree	MER44C	UW.Motif.0645	UW.Motif.0645	33	92	850	0.358696
Uw	Rep2K562	LTR15	UP00246	HOXA11	33	96	271	0.34375
Uw	Rep2Gm12865	LTR2B	M00205	NR3C1	33	104	332	0.317308
Uw	Rep1Gm12865	LTR2B	M00665	SP3	33	104	332	0.317308
Uw	Rep1Hee	LTR18A	UW.Motif.0515	UW.Motif.0515	33	120	264	0.275
Uw	Rep1H7es	MER11B	UW.Motif.0403	UW.Motif.0403	33	121	552	0.272727
Uw	Rep1Saec	LTR10F	UP00090	ELF3	33	124	441	0.266129
Duke	H9es	LTR1	UW.Motif.0519	UW.Motif.0519	33	148	1420	0.222973
Uw	Rep1H7es	HERVIP10FH-int	M00248	POU2F1	33	149	679	0.221477
Uw	Rep1Hrpe	MSTC	UW.Motif.0184	UW.Motif.0184	33	158	3152	0.208861
Uw	Rep1Saec	LTR10E	M01655	TRP53	32	43	282	0.744186
Uw	Rep2Mcf7	MER11B	UW.Motif.0012	UW.Motif.0012	32	43	552	0.744186
Uw	Rep2Nb4	MER57A1	UW.Motif.0213	UW.Motif.0213	32	49	1044	0.653061
Uw	Rep2Hee	MER61D	M01656	TRP63	32	53	273	0.603774
Uw	Rep2Helas3	MER57C2	M00287	NFYA	32	54	451	0.592593
Uw	Rep1H7es	LTR3A	UW.Motif.0318	UW.Motif.0318	32	54	167	0.592593
Uw	Rep1Jurkat	LTR45B	UW.Motif.0339	UW.Motif.0339	32	55	446	0.581818
Uw	Rep1Cmk	LTR62	UW.Motif.0058	UW.Motif.0058	32	60	316	0.533333
Uw	Rep2Hae	LTR13A	UW.Motif.0490	UW.Motif.0490	32	65	187	0.492308
Duke	Gm18507	LTR2B	MA0146	ZFX	32	66	332	0.484848
Uw	Rep1Hae	LTR13A	UW.Motif.0200	UW.Motif.0200	32	70	187	0.457143
Uw	Rep2Hre	LTR2B	UW.Motif.0380	UW.Motif.0380	32	71	332	0.450704
Uw	Rep1Cmk	MER61E	M01655	TRP53	32	81	323	0.395062
Uw	Rep2Hae	LTR5B	UW.Motif.0510	UW.Motif.0510	32	85	423	0.376471
Uw	Rep1Hae	LTR5B	UW.Motif.0510	UW.Motif.0510	32	92	423	0.347826
Uw	Rep2K562	LTR15	UP00245	HOXC10	32	96	271	0.333333
Uw	Rep2K562	LTR5B	UW.Motif.0581	UW.Motif.0581	32	103	423	0.31068
Uw	Rep2Gm12865	LTR2B	M00665	SP3	32	104	332	0.307692
Duke	H9es	MER4D	UW.Motif.0203	UW.Motif.0203	32	139	1319	0.230216
Uw	Rep2Mcf7	MER51A	UP00179	POU2F3	32	144	954	0.222222
Duke	AosmcSerumfree	Tigger7	UW.Motif.0476	UW.Motif.0476	32	152	3105	0.210526
Uw	Rep1Hee	LTR10F	UP00085	SFPI1	32	159	441	0.201258
Uw	Rep1H1es	MER61C	M01655	TRP53	31	40	305	0.775
Uw	Rep1Hee	LTR10E	UP00077	SRF	31	50	282	0.62
Uw	Rep1Cmk	LTR12	M00287	NFYA	31	52	767	0.596154
Uw	Rep1H7es	MER61C	M01655	TRP53	31	56	305	0.553571
Uw	Rep2Mcf7	MER11A	UW.Motif.0085	UW.Motif.0085	31	66	954	0.469697
Uw	Rep2Hre	LTR13A	UW.Motif.0286	UW.Motif.0286	31	66	187	0.469697
Uw	Rep2K562	MER61E	M01591	TAL1	31	69	323	0.449275
Uw	Rep1Hae	LTR13A	UW.Motif.0286	UW.Motif.0286	31	70	187	0.442857
Uw	Rep2Hre	LTR2B	MA0007	AR	31	71	332	0.43662
Uw	Rep1Hee	MER61E	M00348	GATA2	31	72	323	0.430556
Uw	Rep1Hre	LTR13A	UW.Motif.0200	UW.Motif.0200	31	73	187	0.424658
Duke	H9es	MER4A1	UW.Motif.0613	UW.Motif.0613	31	84	2223	0.369048
Uw	Rep2K562	LTR19B	M01591	TAL1	31	86	276	0.360465
Uw	Rep2K562	LTR19B	UW.Motif.0648	UW.Motif.0648	31	86	276	0.360465
Uw	Rep1Gm12865	MER44A	M00699	IRF8	31	89	2351	0.348315
Duke	H9es	MER4B	UW.Motif.0423	UW.Motif.0423	31	89	1725	0.348315
Uw	Rep1Mcf7	LTR9	UW.Motif.0333	UW.Motif.0333	31	91	1990	0.340659
Uw	Rep1H1es	MER67D	UW.Motif.0103	UW.Motif.0103	31	94	1022	0.329787
Uw	Rep2K562	LTR15	UP00235	HOXC11	31	96	271	0.322917
Uw	Rep1H7es	LTR6B	MA0148	FOXA1	31	103	152	0.300971
Uw	Rep2Helas3	MER51A	UP00179	POU2F3	31	113	954	0.274336
Uw	Rep2Hee	LTR10F	MA0073	RREB1	31	133	441	0.233083
Duke	H9es	MER4D	UW.Motif.0339	UW.Motif.0339	31	139	1319	0.223022
Uw	Rep2Hee	LTR10C	M00287	NFYA	31	143	515	0.216783
Uw	Rep1H7es	MER66B	UW.Motif.0218	UW.Motif.0218	31	151	1407	0.205298
Uw	Rep1Cmk	LTR12	UW.Motif.0473	UW.Motif.0473	30	52	767	0.576923
Uw	Rep1Hrcepic	LTR13A	UW.Motif.0490	UW.Motif.0490	30	56	187	0.535714
Uw	Rep1Hrcepic	LTR13A	UW.Motif.0583	UW.Motif.0583	30	56	187	0.535714
Uw	Rep2Hrcepic	LTR13A	UW.Motif.0490	UW.Motif.0490	30	58	187	0.517241
Duke	Gm19238V2	LTR2B	UW.Motif.0286	UW.Motif.0286	30	62	332	0.483871
Uw	Rep2Hae	LTR13A	UW.Motif.0200	UW.Motif.0200	30	65	187	0.461538
Uw	Rep2Mcf7	MER11A	UW.Motif.0012	UW.Motif.0012	30	66	954	0.454545
Uw	Rep1H1es	MER61A	M00491	PATZ1	30	76	797	0.394737
Uw	Rep1Hae	LTR19A	UW.Motif.0511	UW.Motif.0511	30	77	441	0.38961
Uw	Rep1Hae	LTR19A	UW.Motif.0525	UW.Motif.0525	30	77	441	0.38961
Uw	Rep1Cmk	MER61E	M00082	RUNX1	30	81	323	0.37037
Duke	H9es	MER4A1	UW.Motif.0573	UW.Motif.0573	30	84	2223	0.357143
Uw	Rep2K562	LTR19B	M00348	GATA2	30	86	276	0.348837
Uw	Rep1Gm12865	MER57B2	M00287	NFYA	30	87	1095	0.344828
Uw	Rep2Mcf7	MER11D	UW.Motif.0606	UW.Motif.0606	30	87	260	0.344828
Uw	Rep1H7es	LTR6A	UP00021	ZFP281	30	89	271	0.337079
Uw	Rep2K562	LTR15	M01295	ATF5	30	96	271	0.3125
Uw	Rep2K562	LTR15	UP00117	HOXD11	30	96	271	0.3125
Uw	Rep1Jurkat	LTR1	UP00093	KLF7	30	97	1420	0.309278
Uw	Rep1Jurkat	LTR1	UW.Motif.0519	UW.Motif.0519	30	97	1420	0.309278
Uw	Rep2Hee	LTR18A	UW.Motif.0515	UW.Motif.0515	30	116	264	0.258621
Uw	Rep1H7es	MER74B	UW.Motif.0169	UW.Motif.0169	30	119	936	0.252101
Uw	Rep1Cmk	LTR2	UW.Motif.0530	UW.Motif.0530	30	119	881	0.252101
Uw	Rep1Hee	LTR18A	M00672	TEF	30	120	264	0.25
Uw	Rep1H7es	MER11B	UW.Motif.0063	UW.Motif.0063	30	121	552	0.247934
Duke	Hepg2V3	LTR1	MA0039	KLF4	30	127	1420	0.23622
Uw	Rep1H7es	L1PBa1	MA0079	SP1	30	127	407	0.23622
Duke	Hepg2V3	LTR1	UW.Motif.0519	UW.Motif.0519	30	127	1420	0.23622
Uw	Rep1H7es	MER61A	UW.Motif.0035	UW.Motif.0035	30	135	797	0.222222
Uw	Rep1H1es	MER11B	MA0107	RELA	29	47	552	0.617021
Uw	Rep1Hre	LTR10A	UW.Motif.0189	UW.Motif.0189	29	53	315	0.54717
Uw	Rep1H7es	MER61E	M01591	TAL1	29	55	323	0.527273
Uw	Rep1H7es	MER61E	MA0035	GATA1	29	55	323	0.527273
Uw	Rep1Cmk	LTR19B	MA0035	GATA1	29	62	276	0.467742
Uw	Rep2Hae	LTR13A	UW.Motif.0286	UW.Motif.0286	29	65	187	0.446154
Uw	Rep1H1es	LTR22C	M01590	SMAD1	29	67	386	0.432836
Uw	Rep1H1es	LTR22C	UP00197	HOXC9	29	67	386	0.432836
Uw	Rep1Hee	MER61E	UW.Motif.0562	UW.Motif.0562	29	72	323	0.402778
Uw	Rep1H7es	LTR22A	M01217	NR4A1	29	73	188	0.39726
Uw	Rep2Hee	MER61E	UW.Motif.0562	UW.Motif.0562	29	74	323	0.391892
Uw	Rep1Saec	MER61E	UW.Motif.0363	UW.Motif.0363	29	79	323	0.367089
Uw	Rep1Saec	MER61E	UW.Motif.0562	UW.Motif.0562	29	79	323	0.367089
Uw	Rep1Cmk	MER61E	MA0106	TP53	29	81	323	0.358025
Uw	Rep1H7es	LTR19B	M00348	GATA2	29	84	276	0.345238
Uw	Rep2K562	LTR19B	MA0035	GATA1	29	86	276	0.337209
Uw	Rep2Mcf7	MER11D	M00082	RUNX1	29	87	260	0.333333
Uw	Rep1Gm12865	MER57B2	UW.Motif.0357	UW.Motif.0357	29	87	1095	0.333333
Duke	H9es	MER4B	UW.Motif.0440	UW.Motif.0440	29	89	1725	0.325843
Duke	H9es	MER66B	UP00056	RFX4	29	93	1407	0.311828
Uw	Rep1H1es	MER67C	UW.Motif.0270	UW.Motif.0270	29	101	1646	0.287129
Uw	Rep2Hrcepic	LTR2B	MA0146	ZFX	29	102	332	0.284314
Uw	Rep2Hrcepic	LTR2B	UW.Motif.0286	UW.Motif.0286	29	102	332	0.284314
Uw	Rep1H1es	MER4B	UW.Motif.0423	UW.Motif.0423	29	104	1725	0.278846
Uw	Rep2Helas3	MER51A	UW.Motif.0524	UW.Motif.0524	29	113	954	0.256637
Uw	Rep2Hee	LTR18A	M00672	TEF	29	116	264	0.25
Uw	Rep1Hee	LTR18A	UW.Motif.0598	UW.Motif.0598	29	120	264	0.241667
Uw	Rep1Saec	LTR10F	M00444	VDR	29	124	441	0.233871
Uw	Rep1H7es	L1PBa1	M00649	MAZ	29	127	407	0.228346
Uw	Rep1H7es	L1PBa1	M00983	MAF	29	127	407	0.228346
Uw	Rep1H7es	L1PBa1	UP00021	ZFP281	29	127	407	0.228346
Uw	Rep1H7es	L1PBa1	UW.Motif.0600	UW.Motif.0600	29	127	407	0.228346
Uw	Rep2Hee	LTR10F	UP00090	ELF3	29	133	441	0.218045
Uw	Rep2Mcf7	MER51A	UW.Motif.0495	UW.Motif.0495	29	144	954	0.201389
Uw	Rep1Jurkat	LTR14A	UW.Motif.0139	UW.Motif.0139	28	31	121	0.903226
Uw	Rep1H1es	MER61C	MA0106	TP53	28	40	305	0.7
Duke	NhekV2	LTR18A	M00037	NFE2	28	52	264	0.538462
Uw	Rep2Hre	LTR10A	UW.Motif.0189	UW.Motif.0189	28	53	315	0.528302
Uw	Rep1Saec	MER61C	UW.Motif.0405	UW.Motif.0405	28	60	305	0.466667
Uw	Rep1Cmk	LTR19B	M00348	GATA2	28	62	276	0.451613
Duke	H9es	LTR6A	UP00080	GATA5	28	62	271	0.451613
Uw	Rep2Mcf7	MER11A	MA0107	RELA	28	66	954	0.424242
Duke	Gm18507	LTR2B	UW.Motif.0286	UW.Motif.0286	28	66	332	0.424242
Uw	Rep1Mcf7	MER57B2	UW.Motif.0064	UW.Motif.0064	28	68	1095	0.411765
Uw	Rep1Hee	MER61E	UW.Motif.0363	UW.Motif.0363	28	72	323	0.388889
Uw	Rep1H7es	LTR22A	M01198	NR1H2::RXRA	28	73	188	0.383562
Uw	Rep1H7es	LTR22A	MA0017	NR2F1	28	73	188	0.383562
Uw	Rep1Hre	LTR13A	UW.Motif.0286	UW.Motif.0286	28	73	187	0.383562
Uw	Rep2Hee	MER61E	UW.Motif.0363	UW.Motif.0363	28	74	323	0.378378
Duke	H9es	MSTB-int	UW.Motif.0432	UW.Motif.0432	28	74	867	0.378378
Uw	Rep1Hae	LTR19A	UW.Motif.0471	UW.Motif.0471	28	77	441	0.363636
Uw	Rep1Cmk	MER61E	M00348	GATA2	28	81	323	0.345679
Uw	Rep1H7es	LTR19B	M00706	GTF2I	28	84	276	0.333333
Duke	H9es	MER4A1	UW.Motif.0516	UW.Motif.0516	28	84	2223	0.333333
Uw	Rep1Gm12865	MER57B2	UW.Motif.0094	UW.Motif.0094	28	87	1095	0.321839
Uw	Rep1H7es	LTR7C	UW.Motif.0143	UW.Motif.0143	28	90	320	0.311111
Uw	Rep2K562	LTR15	UW.Motif.0500	UW.Motif.0500	28	96	271	0.291667
Uw	Rep1H1es	MER4A1	UW.Motif.0190	UW.Motif.0190	28	100	2223	0.28
Uw	Rep1H1es	MER4A1	UW.Motif.0573	UW.Motif.0573	28	100	2223	0.28
Uw	Rep1H1es	MER67C	M00480	TOPORS	28	101	1646	0.277228
Uw	Rep1H7es	LTR5B	UW.Motif.0339	UW.Motif.0339	28	101	423	0.277228
Uw	Rep1Gm12865	LTR2B	UW.Motif.0380	UW.Motif.0380	28	104	332	0.269231
Uw	Rep2Gm12865	LTR2B	UW.Motif.0380	UW.Motif.0380	28	104	332	0.269231
Uw	Rep1Gm12865	LTR2B	UW.Motif.0611	UW.Motif.0611	28	104	332	0.269231
Uw	Rep2Gm12865	LTR2B	UW.Motif.0611	UW.Motif.0611	28	104	332	0.269231
Uw	Rep2Hee	LTR10F	M00444	VDR	28	133	441	0.210526
Duke	H9es	MER4D	UW.Motif.0423	UW.Motif.0423	28	139	1319	0.201439
Uw	Rep1Jurkat	MER51E	M00287	NFYA	27	42	247	0.642857
Uw	Rep1Saec	LTR10E	UP00077	SRF	27	43	282	0.627907
Uw	Rep2Hrcepic	LTR10A	UW.Motif.0189	UW.Motif.0189	27	47	315	0.574468
Uw	Rep1H7es	MER61C	MA0106	TP53	27	56	305	0.482143
Uw	Rep2Hrcepic	LTR13A	UW.Motif.0583	UW.Motif.0583	27	58	187	0.465517
Uw	Rep1Mcf7	MER11D	UW.Motif.0682	UW.Motif.0682	27	58	260	0.465517
Uw	Rep1Hee	L1PBa1	M00821	NFE2L2	27	62	407	0.435484
Uw	Rep1Hee	L1PBa1	M00983	MAF	27	62	407	0.435484
Uw	Rep2Hre	LTR13A	UW.Motif.0200	UW.Motif.0200	27	66	187	0.409091
Uw	Rep1H1es	MSTB-int	UW.Motif.0432	UW.Motif.0432	27	70	867	0.385714
Uw	Rep1H7es	LTR22A	M01650	NR2E3	27	73	188	0.369863
Uw	Rep1H7es	LTR22A	M01725	NR2C2	27	73	188	0.369863
Uw	Rep2Gm12865	MER57B2	M00287	NFYA	27	77	1095	0.350649
Uw	Rep1H7es	MER4E	UW.Motif.0513	UW.Motif.0513	27	77	728	0.350649
Uw	Rep1Cmk	MER61E	M01656	TRP63	27	81	323	0.333333
Uw	Rep1H7es	LTR2	UW.Motif.0530	UW.Motif.0530	27	82	881	0.329268
Uw	Rep1H7es	LTR2	UW.Motif.0635	UW.Motif.0635	27	82	881	0.329268
Duke	H9es	MER4A1	UW.Motif.0227	UW.Motif.0227	27	84	2223	0.321429
Duke	H9es	MER4B	UW.Motif.0339	UW.Motif.0339	27	89	1725	0.303371
Uw	Rep1Cmk	LTR5B	UW.Motif.0314	UW.Motif.0314	27	91	423	0.296703
Uw	Rep1Cmk	LTR5B	UW.Motif.0510	UW.Motif.0510	27	91	423	0.296703
Uw	Rep1Saec	LTR18A	M00672	TEF	27	96	264	0.28125
Uw	Rep1Hrcepic	LTR2B	MA0146	ZFX	27	100	332	0.27
Uw	Rep1Cmk	THE1A	UW.Motif.0150	UW.Motif.0150	27	115	4219	0.234783
Uw	Rep2Hee	LTR18A	UW.Motif.0598	UW.Motif.0598	27	116	264	0.232759
Uw	Rep1H7es	L1MCb	MA0143	SOX2	27	117	2147	0.230769
Uw	Rep2K562	LTR9	M00733	SMAD4	27	120	1990	0.225
Uw	Rep1Mcf7	MER51A	UW.Motif.0514	UW.Motif.0514	27	120	954	0.225
Uw	Rep2Hrpe	MSTC	UP00055	HBP1	27	123	3152	0.219512
Uw	Rep2Hrpe	MSTC	UP00229	OTX1	27	123	3152	0.219512
Uw	Rep1Saec	LTR10F	MA0073	RREB1	27	124	441	0.217742
Uw	Rep1Saec	LTR10F	UP00085	SFPI1	27	124	441	0.217742
Duke	Hepg2V3	LTR1	UP00093	KLF7	27	127	1420	0.212598
Uw	Rep1H7es	LTR22B	UP00145	BARHL2	27	129	226	0.209302
Uw	Rep1Hrpe	LTR14C	UP00125	PITX2	26	33	137	0.787879
Duke	NhekV2	MER61C	M01655	TRP53	26	34	305	0.764706
Uw	Rep2K562	LTR9B	UP00179	POU2F3	26	35	761	0.742857
Uw	Rep2Nb4	LTR4	M01590	SMAD1	26	39	96	0.666667
Duke	Mcf7	MER11D	UW.Motif.0682	UW.Motif.0682	26	45	260	0.577778
Uw	Rep1Cmk	MER48	M00678	ETV7	26	54	196	0.481481
Uw	Rep2Hee	LTR10E	UP00030	SOX11	26	54	282	0.481481
Uw	Rep1Mcf7	LTR10A	M00495	BACH1	26	57	315	0.45614
Uw	Rep1Saec	MER61C	UW.Motif.0203	UW.Motif.0203	26	60	305	0.433333
Uw	Rep1Cmk	LTR19B	M01591	TAL1	26	62	276	0.419355
Uw	Rep2Mcf7	LTR10A	M00495	BACH1	26	63	315	0.412698
Uw	Rep2Hae	LTR19A	UW.Motif.0471	UW.Motif.0471	26	65	441	0.4
Uw	Rep2Hae	LTR19A	UW.Motif.0525	UW.Motif.0525	26	65	441	0.4
Duke	H9es	MER52C	MA0039	KLF4	26	67	374	0.38806
Uw	Rep1H1es	MER74B	MA0143	SOX2	26	68	936	0.382353
Uw	Rep1Cmk	LTR52	UP00080	GATA5	26	68	1080	0.382353
Uw	Rep2Helas3	LTR10A	M00821	NFE2L2	26	70	315	0.371429
Uw	Rep2Helas3	LTR10A	UP00036	MYF6	26	70	315	0.371429
Uw	Rep1Hae	LTR13A	UW.Motif.0619	UW.Motif.0619	26	70	187	0.371429
Uw	Rep1H7es	LTR22A	UP00197	HOXC9	26	73	188	0.356164
Uw	Rep2Gm12865	MER57B2	UW.Motif.0094	UW.Motif.0094	26	77	1095	0.337662
Uw	Rep1Hae	LTR19A	UW.Motif.0474	UW.Motif.0474	26	77	441	0.337662
Duke	H9es	MER67C	UW.Motif.0270	UW.Motif.0270	26	79	1646	0.329114
Uw	Rep2Mcf7	MER4D1	UW.Motif.0631	UW.Motif.0631	26	80	1505	0.325
Uw	Rep1H7es	LTR19B	M01591	TAL1	26	84	276	0.309524
Uw	Rep1H7es	LTR19B	MA0035	GATA1	26	84	276	0.309524
Duke	Myometr	MER44C	UW.Motif.0645	UW.Motif.0645	26	86	850	0.302326
Uw	Rep1H7es	LTR7C	UW.Motif.0181	UW.Motif.0181	26	90	320	0.288889
Duke	H9es	MER66B	UW.Motif.0218	UW.Motif.0218	26	93	1407	0.27957
Uw	Rep1H1es	MER67D	UW.Motif.0458	UW.Motif.0458	26	94	1022	0.276596
Uw	Rep1Gm12865	LTR2B	MA0007	AR	26	104	332	0.25
Uw	Rep1Cmk	LTR2	UW.Motif.0635	UW.Motif.0635	26	119	881	0.218487
Uw	Rep1H7es	MER11B	UP00032	GATA3	26	121	552	0.214876
Uw	Rep1Saec	LTR10F	M00287	NFYA	26	124	441	0.209677
Uw	Rep1H7es	L1PBa1	M00037	NFE2	26	127	407	0.204724
Uw	Rep1H7es	L1PBa1	UP00028	TCFAP2E	26	127	407	0.204724
Uw	Rep1H7es	L1PBa1	UW.Motif.0333	UW.Motif.0333	26	127	407	0.204724
Uw	Rep1H7es	LTR22B	UP00171	MSX3	26	129	226	0.20155
